# Supplementary material for: Challenges in the solution phase synthesis of PSMA-11 and PSMA-617: organic ligands for radiopharmaceutical preparations in prostate cancer medication
Source: publisher site journal article supplement (doi:10.1515/ract-2024-0280), 2024-04-30
Supplement: Supplementary file 1 [file j_ract-2024-0280_suppl_001.pdf]

## Supplementary Material

### Challenges in the solution phase synthesis of PSMA-11 and PSMA-617: Organic ligands for radiopharmaceutical preparations in prostate cancer medication

K. S. Ajish Kumar\*<sup>1,2</sup> and Anupam Mathur<sup>3</sup>

<sup>1</sup>*Bio-Organic Division, Bhabha Atomic Research Centre, Mumbai, India*

<sup>2</sup>*Homi Bhabha National Institute, Anushaktinagar, Mumbai 400094, India*

<sup>3</sup>*Radiopharmaceuticals Program, Board of Radiation and Isotope Technology,  
Navi Mumbai 400703, India*

Email: [ajish@barc.gov.in](mailto:ajish@barc.gov.in)

Radio HPLC-Profile of [<sup>177</sup>Lu]Lu-PSMA-617.....S2

Paper chromatogram of [<sup>177</sup>Lu]Lu-PSMA-617.....S2

Radio HPLC-Profile of [<sup>68</sup>Ga]Ga-PSMA-11.....S3

Paper chromatogram of [<sup>68</sup>Ga]Ga-PSMA-11.....S3

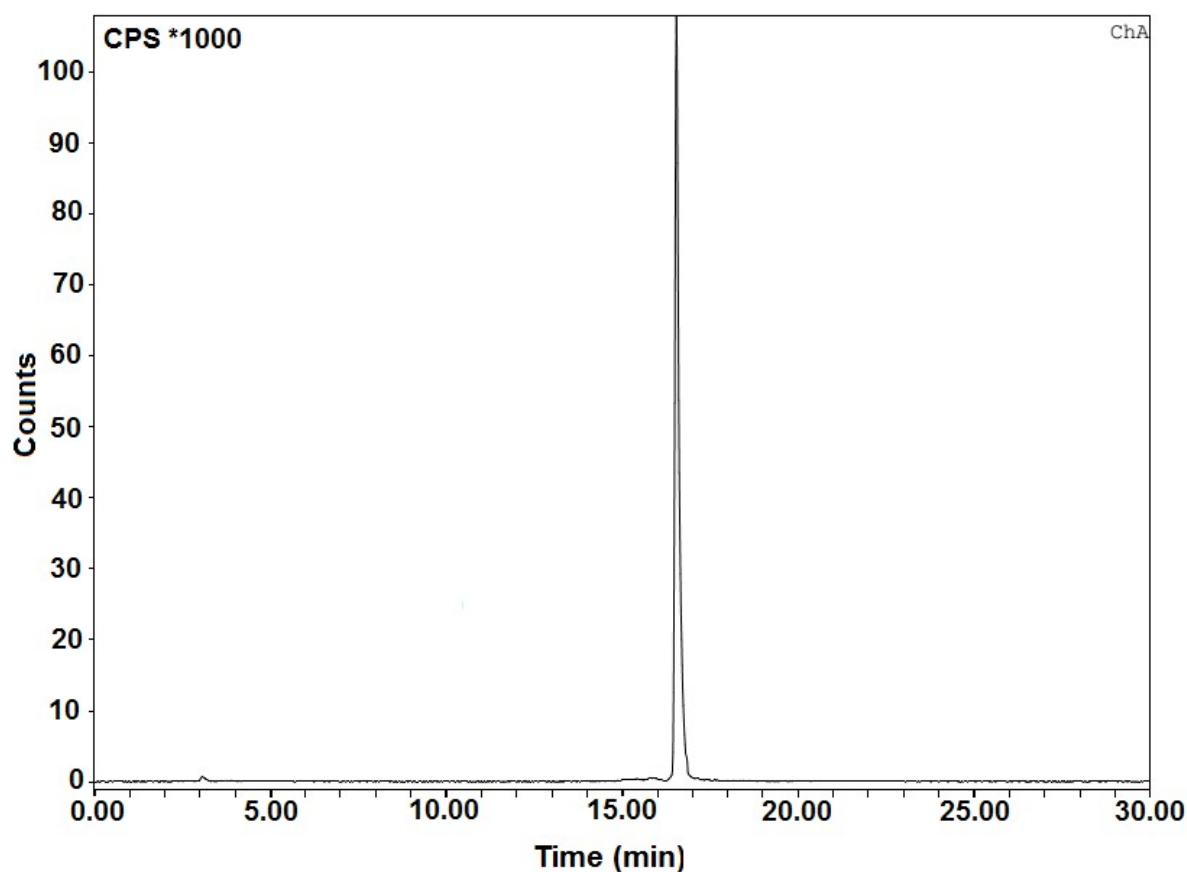

**Fig. S1.** Radiochemical purity of [ $^{177}\text{Lu}$ ]Lu-PSMA-617 observed using synthesized PSMA-617 ( $^{177}\text{Lu}$  activity used 10-20 mCi). Solvent gradient was 95% water, to 5% water over 30 min at a flow rate of 1 mL/min.

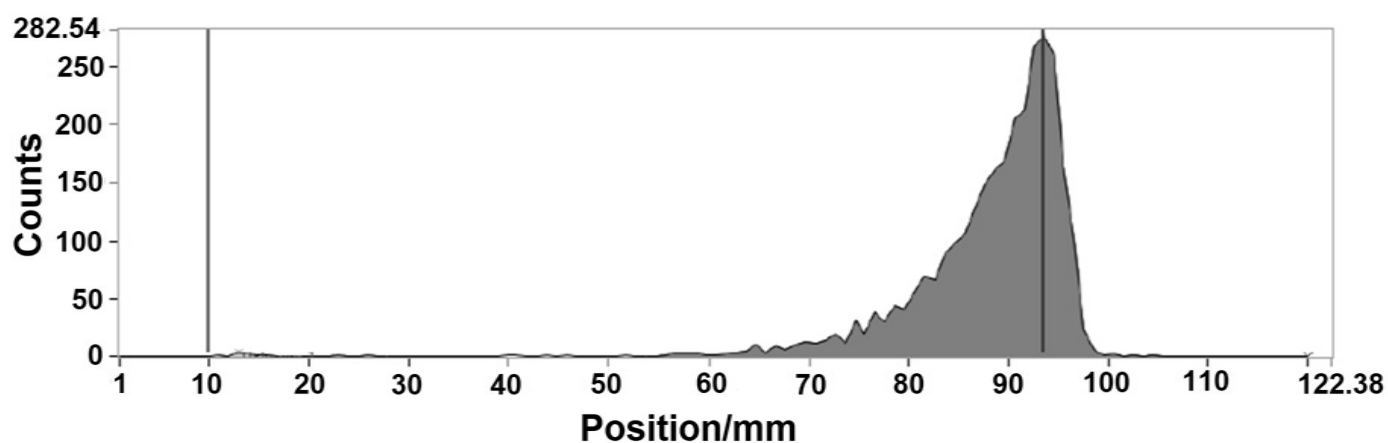

**Fig. S2.** Paper chromatogram of [ $^{177}\text{Lu}$ ]Lu-PSMA-617 made from synthesized PSMA-617.

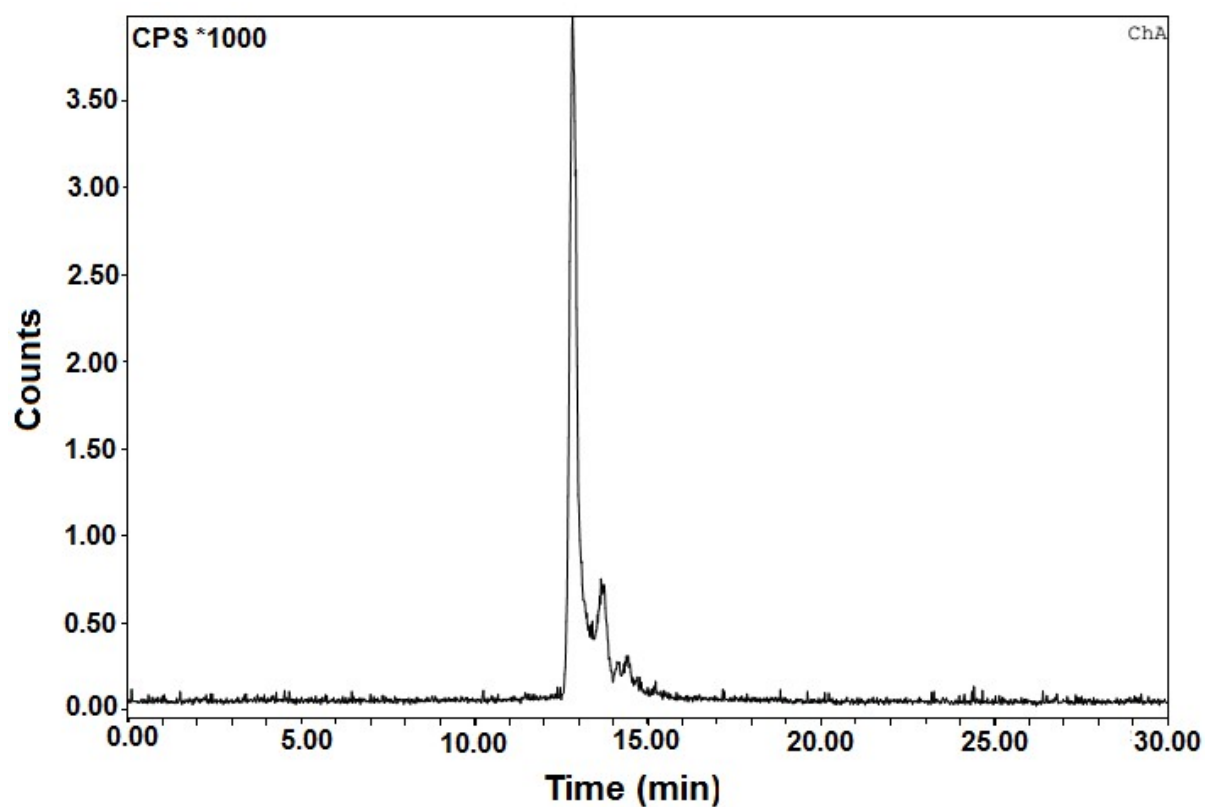

**Fig. S3.** Radiochemical purity of [ $^{68}\text{Ga}$ ]Ga-PSMA-11 observed using synthesized PSMA-11 ( $^{68}\text{Ga}$  activity used 20-100  $\mu\text{Ci}$ ). Solvent gradient was 90% water, to 10% water over 30 min at a flow rate of 1 mL/min.

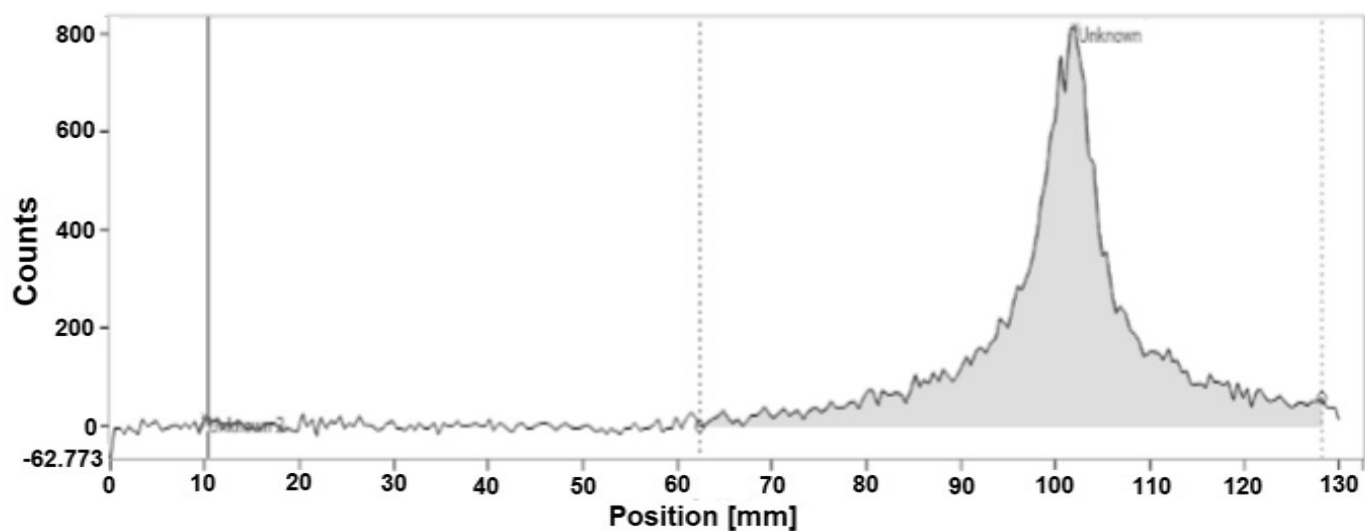

**Fig. S4.** Paper chromatogram of [ $^{68}\text{Ga}$ ]Ga-PSMA-11 made from synthesized PSMA-11.
